# Supplementary material
Source: PubMed Central journal article supplement (PMC4970877)
Supplement: NIHMS790158-supplement-Supplemental.pdf [file NIHMS790158-supplement-Supplemental.pdf]

Supplemental Table S1 - Sample size and inclusion criteria across BMDCS studies

| Study (PMID)        | Genetic Exposure    | Discovery (N) | Replication (N) | Ancestry | Ancestry Definition | Siblings       |
|---------------------|---------------------|---------------|-----------------|----------|---------------------|----------------|
| Chesi (26041818)    | GWAS                | 1371          | 481             | All      | N/A                 | Included       |
| Mitchell (25762182) | 63 BMD variants     | 603           | 0               | European | PC ( $\pm 4.0$ SD)  | Older excluded |
| Mitchell (26572781) | Genetic Risk Scores | 794 – 819*    | 0               | European | PC (>50% ADMIX)     | Older excluded |
| Mitchell (NA)       | EN1 & SOX6          | 932           | 486             | European | PC (>50% ADMIX)     | Included**     |

\*Sample size dependent on data available for calculating genetic risk scores

\*\*Older excluded in sex-combined analyses to test for SNP-sex interactions

Supplemental Table S2 - Variants near *ENI* and *SOX6* and associations with pediatric bone Z-scores (adjusting for 10 principal components)

| SNP<br>(Effect Allele) | EAF  | Nearest<br>Gene | Site      | Both Sexes (N=1,301) <sup>a</sup> |              |              | Females (N=730) |              |                            | Males (N=684) |               |              |
|------------------------|------|-----------------|-----------|-----------------------------------|--------------|--------------|-----------------|--------------|----------------------------|---------------|---------------|--------------|
|                        |      |                 |           | Beta                              | 95% CI       | P-value      | Beta            | 95% CI       | P-value                    | Beta          | 95% CI        | P-value      |
| rs11692564 (T)         | 0.01 | <i>ENI</i>      | Total Hip | 0.59                              | (0.23,0.95)  | <b>0.001</b> | 0.86            | (0.48,1.24)  | <b>9.7x10<sup>-6</sup></b> | -0.12         | (-0.58,0.35)  | 0.625        |
| rs11692564 (T)         | 0.01 | <i>ENI</i>      | Fem Neck  | 0.54                              | (0.13,0.95)  | <b>0.010</b> | 0.77            | (0.32,1.22)  | <b>8.5x10<sup>-4</sup></b> | -0.25         | (-0.84,0.34)  | 0.402        |
| rs11692564 (T)         | 0.01 | <i>ENI</i>      | Spine     | 0.22                              | (-0.17,0.61) | 0.277        | 0.42            | (0.01,0.82)  | 0.043                      | -0.39         | (-0.94,0.15)  | 0.159        |
| rs11692564 (T)         | 0.01 | <i>ENI</i>      | Radius    | 0.01                              | (-0.38,0.41) | 0.949        | 0.43            | (0.01,0.85)  | 0.043                      | -0.45         | (-0.98,0.07)  | 0.087        |
| rs11692564 (T)         | 0.01 | <i>ENI</i>      | TBLH      | 0.19                              | (-0.09,0.46) | 0.184        | 0.36            | (0.11,0.62)  | <b>0.005</b>               | -0.27         | (-0.78,0.24)  | 0.295        |
| rs188303909 (T)        | 0.01 | <i>ENI</i>      | Total Hip | 0.42                              | (0.03,0.82)  | 0.036        | 0.66            | (0.22,1.11)  | <b>0.004</b>               | 0.04          | (-0.43,0.50)  | 0.878        |
| rs188303909 (T)        | 0.01 | <i>ENI</i>      | Fem Neck  | 0.35                              | (-0.03,0.74) | 0.074        | 0.52            | (0.12,0.93)  | 0.012                      | -0.06         | (-0.66,0.54)  | 0.840        |
| rs188303909 (T)        | 0.01 | <i>ENI</i>      | Spine     | -0.04                             | (-0.41,0.33) | 0.834        | 0.10            | (-0.27,0.47) | 0.597                      | -0.27         | (-0.80,0.27)  | 0.327        |
| rs188303909 (T)        | 0.01 | <i>ENI</i>      | Radius    | -0.25                             | (-0.67,0.17) | 0.251        | 0.24            | (-0.22,0.70) | 0.308                      | -0.38         | (-0.92,0.17)  | 0.180        |
| rs188303909 (T)        | 0.01 | <i>ENI</i>      | TBLH      | 0.09                              | (-0.14,0.32) | 0.447        | 0.23            | (0.04,0.41)  | 0.016                      | -0.07         | (-0.55,0.41)  | 0.772        |
| rs6542457 (C)          | 0.07 | <i>ENI</i>      | Total Hip | 0.1                               | (-0.03,0.23) | 0.129        | 0.13            | (-0.05,0.32) | 0.152                      | 0.01          | (-0.16,0.18)  | 0.927        |
| rs6542457 (C)          | 0.07 | <i>ENI</i>      | Fem Neck  | 0.11                              | (-0.03,0.24) | 0.119        | 0.18            | (-0.01,0.37) | 0.062                      | -0.04         | (-0.21,0.13)  | 0.659        |
| rs6542457 (C)          | 0.07 | <i>ENI</i>      | Spine     | 0.07                              | (-0.05,0.20) | 0.262        | 0.20            | (0.02,0.38)  | 0.029                      | -0.16         | (-0.33,0.001) | 0.060        |
| rs6542457 (C)          | 0.07 | <i>ENI</i>      | Radius    | 0.1                               | (-0.02,0.21) | 0.102        | 0.13            | (-0.02,0.29) | 0.098                      | 0.06          | (-0.09,0.21)  | 0.412        |
| rs6542457 (C)          | 0.07 | <i>ENI</i>      | TBLH      | 0.04                              | (-0.05,0.14) | 0.396        | 0.09            | (-0.04,0.22) | 0.197                      | -0.04         | (-0.17,0.08)  | 0.489        |
| rs55983207 (C)         | 0.06 | <i>ENI</i>      | Total Hip | 0.13                              | (-0.03,0.30) | 0.107        | 0.11            | (-0.10,0.32) | 0.301                      | 0.18          | (-0.05,0.41)  | 0.121        |
| rs55983207 (C)         | 0.06 | <i>ENI</i>      | Fem Neck  | 0.12                              | (-0.03,0.27) | 0.113        | 0.12            | (-0.08,0.32) | 0.237                      | 0.16          | (-0.05,0.37)  | 0.128        |
| rs55983207 (C)         | 0.06 | <i>ENI</i>      | Spine     | 0.16                              | (0.01,0.31)  | 0.033        | 0.05            | (-0.14,0.24) | 0.605                      | 0.25          | (0.04,0.46)   | 0.020        |
| rs55983207 (C)         | 0.06 | <i>ENI</i>      | Radius    | 0.05                              | (-0.10,0.21) | 0.505        | 0.02            | (-0.21,0.25) | 0.872                      | 0.05          | (-0.15,0.25)  | 0.629        |
| rs55983207 (C)         | 0.06 | <i>ENI</i>      | TBLH      | 0.1                               | (-0.02,0.21) | 0.093        | 0.04            | (-0.11,0.18) | 0.640                      | 0.14          | (-0.02,0.29)  | 0.092        |
| rs11024028 (G)         | 0.19 | <i>SOX6</i>     | Total Hip | 0.12                              | (0.03,0.22)  | <b>0.009</b> | 0.07            | (-0.05,0.19) | 0.253                      | 0.15          | (0.02,0.28)   | 0.020        |
| rs11024028 (G)         | 0.19 | <i>SOX6</i>     | Fem Neck  | 0.13                              | (0.04,0.22)  | <b>0.003</b> | 0.11            | (-0.02,0.23) | 0.091                      | 0.13          | (0.01,0.25)   | 0.035        |
| rs11024028 (G)         | 0.19 | <i>SOX6</i>     | Spine     | 0.1                               | (0.01,0.20)  | 0.036        | 0.01            | (-0.11,0.13) | 0.932                      | 0.20          | (0.07,0.33)   | <b>0.002</b> |
| rs11024028 (G)         | 0.19 | <i>SOX6</i>     | Radius    | 0.03                              | (-0.06,0.11) | 0.552        | 0.07            | (-0.04,0.18) | 0.226                      | -0.03         | (-0.16,0.09)  | 0.607        |
| rs11024028 (G)         | 0.19 | <i>SOX6</i>     | TBLH      | 0.09                              | (0.02,0.16)  | <b>0.008</b> | 0.06            | (-0.02,0.14) | 0.169                      | 0.11          | (0.01,0.20)   | 0.029        |

Abbreviations: EAF, effect allele frequency; Fem Neck, femoral neck; TBLH, total body less head. Beta coefficients, 95% confidence intervals and *P*-value are from linear mixed effects models adjusted for age, Tanner stage, body mass index *Z*-score, physical activity, dietary calcium, and 10 principal components (and sex in the sex combined analyses). The *P*-values in bold survived correction for multiple testing of the 5 single nucleotide polymorphisms (SNPs). The participants had repeated bone *Z*-score measures, with up to 7 annual study visits. <sup>a</sup>Opposite sex siblings are included in the Bone Mineral Density in Childhood Study (BMDCS); the older siblings were removed for the sex combined analyses (N=113).
